# Supplementary material
Source: HighWire-hosted journal article supplement (https://rapm.bmj.com/highwire/filestream/24268/field_highwire_adjunct_files/2/rapm-2023-104884supp003_data_supplement.pdf)
Supplement: rapm-2023-104884supp003_data_supplement.pdf [file rapm-2023-104884supp003_data_supplement.pdf]

**Supplementary Appendix 2.** Peripheral nerve blocks considered in this study whose anatomical descriptions are proposed to adhere to the peripheral nerve block template:

<NAME OF PERIPHERAL NERVE> block at the <LOCATION>.

| Name                           | Agreement (%) | Round included | Comments                                    |
|--------------------------------|---------------|----------------|---------------------------------------------|
| Midhumeral block               | 69%           | 2              | Individual nerve blocks should be described |
| Forearm block                  | 70%           | 2              | Individual nerve blocks should be described |
| Wrist block                    | 62%           | 2              | Individual nerve blocks should be described |
| Intercostobrachial nerve block | 56%           | 2              | Multiple approaches possible                |
| Saphenous nerve block          | 57%           | 2              | Multiple approaches proposed and possible   |
| Infrapatellar nerve block      | 76%           | 1              | Multiple approaches possible                |
| Axillary nerve block           | 93%           | 3              | Multiple approaches possible                |

|                                         |      |   |                              |
|-----------------------------------------|------|---|------------------------------|
| Lateral femoral cutaneous nerve block   | 100% | 3 | Multiple approaches possible |
| Posterior femoral cutaneous nerve block | 94%  | 3 | Multiple approaches possible |
| Obturator nerve block                   | 93%  | 3 | Multiple approaches possible |
| Genitofemoral nerve block               | 92%  | 3 | Multiple approaches possible |
| Tibial nerve block at the ankle         | 81%  | 3 | Multiple approaches possible |
